# Supplementary material
Source: PubMed Central journal article supplement (PMC3264785)
Supplement: NIHMS345460-supplement-1_si_001.pdf [file NIHMS345460-supplement-1_si_001.pdf]

1 **Supporting Information for:**

2  
3 **Isolation of Alpaca Anti-Hapten Heavy Chain Single Domain**  
4 **Antibodies for Development of Sensitive Immunoassay**  
5

6 Hee-Joo Kim<sup>1</sup>, Mark R. McCoy<sup>1</sup>, Zuzana Majkova<sup>1</sup>, Julie E. Dechant<sup>2</sup>, Shirley J. Gee<sup>1</sup>, <sup>1</sup>Sofia  
7 Tabares-da Rosa<sup>3</sup>, Gualberto G. González-Sapienza<sup>3</sup> and Bruce D. Hammock<sup>1\*</sup>

8 <sup>1</sup>Department of Entomology and UCD Cancer Center, University of California, Davis, California  
9 95616

10 <sup>2</sup>Department of Surgical and Radiological Sciences, School of Veterinary Medicine, University  
11 of California, Davis, California 95616

12 <sup>3</sup>Cátedra de Inmunología, Facultad de Química, Instituto de Higiene, UDELAR, Av. A. Navarro  
13 3051, piso 2, Montevideo 11600, Uruguay

14

15

16

17

18

19

20

21

22

23

24

25

1     **Materials.** 3-PBA standard, bovine serum albumin (BSA), thyroglobulin, polyethyleneglycol  
2     8000 (PEG 8000), Tween 20, isopropyl- $\beta$ -D-thiogalactopyranoside (IPTG), Freund's incomplete  
3     adjuvant, and 3, 3', 5, 5'-tetramethylbenzidine (TMB) were obtained from Sigma-Aldrich (St.  
4     Louis, MO). Helper phage M13KO7, T4 DNA ligase, and SfiI were purchased from New  
5     England Biolabs (Ipswich, MA). Mouse anti-M13 phage MAb-horseradish peroxidase (HRP)  
6     was purchased from GE Health Care (Piscataway, NJ). Goat anti-HA tag PAb-HRP was  
7     purchased from Abcam (Cambridge, MA). 3-PBA immunizing hapten was previously  
8     synthesized in our laboratory (Figure S-1)<sup>1</sup>. The phagemid vector pComb3XSS was kindly  
9     provided by Dr. Carlos F. Barbas (The Scripps Research Institute, La Jolla, CA). Chemically  
10    competent TOP10F' cells, Platinum<sup>®</sup> Taq DNA Polymerase and The SuperScript III First-Strand  
11    Synthesis System were obtained from Invitrogen (Carlsbad, CA). LeukoLOCK<sup>™</sup> Total RNA  
12    Isolation Kit was obtained from Applied Biosystems (Foster City, CA). Plasmid purification kit,  
13    gel purification kit, PCR purification kit, and 6xHis tag purification resins were obtained from  
14    Qiagen (Valencia, CA). Electrocompetent ER2738 *E. coli* cells were purchased from Lucigen  
15    Corporation (Middleton, WI). B-PER lysis solution was purchased from Thermo Pierce  
16    Scientific (Rockford, IL).

17    **Immunization.** A three-year old castrated male alpaca was subcutaneously immunized with  
18    200  $\mu$ g of 3-PBA hapten-thyroglobulin conjugate diluted in 1 mL of PBS mixed with 1 mL of  
19    Freund's incomplete adjuvant. Identical booster injections followed every 2 weeks for a total of  
20    6 injections. The same hapten was conjugated to BSA and used as a coating antigen for the  
21    screening of positive VHH clones and for assay development. A 5 mL serum sample was taken a  
22    few days prior to each immunization for titer estimation. A week after the final injection, 10 mL

1 of blood was withdrawn from a catheter in the neck vein into EDTA-coated Vacutainer® blood  
2 collection tubes (Becton Dickinson, Franklin Lakes, NJ).

3 **Library construction.** Peripheral blood lymphocytes were isolated from 10 mL of EDTA-  
4 treated blood (about  $10^7$  cells) using the LeukoLOCK™ Total RNA Isolation Kit following the  
5 manufacturer's instructions. The concentration of RNA was calculated by measuring the  
6 absorbance at 260 nm on a NanoDrop (Thermo Scientific, Fremont, CA) and the RNA integrity  
7 was confirmed by denaturing agarose gel electrophoresis. The SuperScript III First-Strand  
8 Synthesis System for RT-PCR with oligo(dT)s as the primers was used to synthesize cDNA from  
9 2.5 µg of RNA. DNA fragments encoding the VHH IgG variable domains were amplified by  
10 PCR using the forward primer Alp-Vh-F1 SfiI: CAT GCC ATG ACT GTG GCC CAG GCG  
11 GCC CAG KTG CAG CTC GTG GAG TCN GGN GG targeting the framework 1 region; and  
12 reverse primers AlpVhh-R1 SfiI: CAT GCC ATG ACT CGC GGC CGG CCT GGC CTC GTG  
13 GGG GTC TTC GCT GTG GTG CG and AlpVhh-R2 SfiI: CAT GCC ATG ACT CGC GGC  
14 CGG CCT GGC CTC GCC TTG TGG TTT TGG TGT CTT GGG corresponding to the short  
15 (IgG3) and long (IgG2) hinge region, respectively. The reverse and forward primers were based  
16 on previously published alpaca sequences (Maass et al<sup>2</sup>) and also introduced two different SfiI  
17 sites (underlined) that were used for subsequent cloning of the fragments into the phagemid  
18 pComb3XSS vector. We also shortened the length of the Alp-Vh-F1 annealing region because  
19 we found in our first attempt that this introduced frame shifts in some of our VHH sequences.  
20 The ligated vector was electroporated into electrocompetent ER2738 cells from *E. coli* using a  
21 MicroPulser Electroporation Apparatus (Biorad Laboratories, Hercules, CA). The resulting  
22 library had an estimated size of  $3.4 \times 10^7$  independent clones. For the amplification and isolation  
23 of the phage-VHH library, the transformed cells were added into a 1 L culture flask containing

1 400 mL Super Broth (SB, 10g of MOPS, 30g of tryptone, 20g of yeast extract, pH 7.0)  
2 containing tetracycline (20 µg/mL) and ampicillin (100 µg/mL). The flask was shaken  
3 vigorously at 37 °C until O.D.600 reached 0.5. The cells were super infected by adding 2 mL of  
4 helper phage M13KO7 ( $1 \times 10^{12}$  c.f.u/mL) by 30 min incubation at 37 °C without shaking. The  
5 flask was shaken for 1 h before kanamycin (70 µg/mL) was added into the flask. On the  
6 following day, the overnight culture was centrifuged at 11,000 x g for 10 min at 4 °C. The clear  
7 supernatant was transferred to clean bottles and 40 mL of 20% PEG 8000/2.5 M NaCl  
8 (PEG/NaCl) was added. The bottles were incubated on ice for 2 h and centrifuged for 15 min at  
9 11,000 x g. The supernatants were discarded and the phage pellets were resuspended with 100  
10 mL of sterilized PBS. Twenty ml of PEG/NaCl was added into each bottle and incubated for 2 h  
11 on ice. The bottles were centrifuged again at 11,000 x g for 15 min at 4 °C. The supernatants  
12 were discarded and the phage pellets were resuspended with 10 mL of phage suspension buffer  
13 (sterilized PBS containing 0.02% sodium azide, 0.5% BSA, and 1x protease inhibitor cocktail  
14 (Roche Bioscience). The phage library solution was filtered through 0.2 µm membrane and  
15 stored at -70 °C until use.

16 **Selection of phage anti- 3-PBA VHH clones.** Six wells of an ELISA plate (Nunc MaxiSorp,  
17 Thermo Fisher) were coated with 0.5 µg/mL of 3-PBA-BSA by overnight incubation at 4 °C.  
18 The plates were blocked with 3% BSA in PBS (350 µL per well) for 1 h at 37 °C. One hundred  
19 µL of the phage VHH library ( $10^{12}$  c.f.u/mL) was added into each well and the plate was  
20 incubated for 2 h at 4 °C with gentle shaking. After washings five times with PBST, the bound  
21 phage-VHHs were competitively eluted with 100 µL of 3-PBA diluted in PBS (1 µg/mL per  
22 well) by 30 min incubation at 4 °C. The phage VHH eluates were transferred to BSA-coated  
23 wells followed by 1 h incubation to remove non specific binders. Unbound phage VHHs were

1 collected and pooled. For amplification of the phage VHH eluates for the next round of panning,  
2 500  $\mu$ L of overnight culture of the ER2738 cells was added into a 125 mL flask containing 10  
3 mL of SB and the cells were grown by shaking at 37 °C until O.D.600 reached 0.5-0.6. Three mL  
4 of the cells were then infected with 200  $\mu$ L of the phage VHH eluates at 37 °C for 30 min  
5 without shaking. Five mL of pre-warmed SB containing 200  $\mu$ g of ampicillin and 60  $\mu$ g of  
6 tetracycline was added to the infected cells and the culture was shaken for 1 h at 37 °C. Five  
7 hundred  $\mu$ g of ampicillin was added and the culture was incubated at 37 °C for 1 h with shaking.  
8 After infecting the cell culture with 1 mL of helper phage by 30 min incubation at 37 °C without  
9 shaking, the culture was transferred to a 500 mL culture flask containing 91 mL SB with 9.4 mg  
10 of ampicillin and 920  $\mu$ g of tetracycline. After shaking 1 h at 37 °C, kanamycin was added at a  
11 final concentration of 70  $\mu$ g/mL. The flask was shaken overnight by vigorous shaking at 250  
12 rpm. The amplified phages were prepared using the procedures described above in the section of  
13 library construction. Four more rounds of panning were carried out with the concentrations of the  
14 3-PBA-BSA and free 3-PBA gradually decreased. For 2<sup>nd</sup>, 3<sup>rd</sup>, 4<sup>th</sup>, and 5<sup>th</sup> panning, the plate was  
15 coated with 3-PBA-BSA at 0.25, 0.1, 0.02, and 0.01  $\mu$ g/well, respectively and the concentrations  
16 of free 3-PBA for the elution of bound phage-VHHs were 1000, 100, 10, 1, and 0.1 ng/mL,  
17 respectively. For the 2<sup>nd</sup> panning, the plates were washed ten times with PBST. For the rest of  
18 panning, the plates were washed ten times and the plates were shaken for 30 min with wells  
19 filled with the washing buffer, followed by ten more washings prior to elution. Post-absorption  
20 of the eluted phage-VHHs was performed throughout the panning under the same condition.  
21 After the final round of panning, individual clones were screened to identify positive clones by  
22 performing an indirect competitive phage ELISA.

1     **Expression and purification of soluble VHHs.** The pComb3XSS phagemid vectors encoding  
2 VHHs with inhibited binding to the coating antigen and unique DNA sequences were extracted  
3 from ER2738 clones and were transformed into the TOP 10F' cells by heat shock following the  
4 manufacturer instructions. A single colony was selected and grown in 5 mL of SB overnight.  
5 One ml of the overnight culture was added to a 500 mL cultural flask containing 100 mL of SB  
6 with tetracycline (100 µg/mL) and ampicillin (100 µg/mL). The flask was shaken until O.D.<sub>600</sub>  
7 reached 0.5. IPTG was added at final concentration of 1 mM, and the flask was shaken overnight  
8 at 250 rpm at 37 °C. The cell cultures were centrifuged at 3,000 x g for 10 min and the cell  
9 pellets were frozen overnight at -70 °C. The melted cell pellets were lysed by adding 6 mL of B-  
10 PER lysis solution containing phenylmethylsulfonyl fluoride (PMSF). The cell lysates were  
11 centrifuged at 13,000 x g for 15 min at 4 °C. The clear supernatant was dialyzed against 6x His  
12 tag purification washing buffer (50 mM NaH<sub>2</sub>PO<sub>4</sub> (pH 8.0), 300 mM NaCl, and 25 mM  
13 imidazole). On the following day, the dialyzed solution was centrifuged again at 13,000 x g for  
14 15 min at 4 °C. The clear supernatant was added into a purification column packed with 1 mL of  
15 Ni-NTA resin which had been washed with 10 mL of washing buffer. The columns were gently  
16 rocked for 1 h at 4 °C. The columns were washed with 10 mL of the washing buffer. The  
17 captured soluble VHHs were eluted with 6 mL of elution buffer (50 mM NaH<sub>2</sub>PO<sub>4</sub> (pH 8.0), 300  
18 mM NaCl, and 250 mM imidazole). The VHH eluate was loaded onto a PD-10 desalting column  
19 for buffer exchange to PBS. The purified soluble VHHs were aliquoted and stored at -70 °C until  
20 use.

21     **VHH ELISA (VELISA) and phage ELISA (PELISA).** One hundred µL of 3-PBA hapten-  
22 BSA conjugate (0.05 µg/mL for the VELISAs and 0.4 µg/mL for PELISAs) diluted in 0.1 M  
23 carbonate-bicarbonate buffer (pH 9.6) was added into wells of a 96-well ELISA plate followed

1 by an overnight incubation at 4 °C. The plate was washed and then blocked with 350 μL of 1%  
2 BSA in PBS by incubation for 1 h at 37 °C. Fifty μL of various concentrations of 3-PBA diluted  
3 in PBS was mixed with an equal volume of soluble VHH (1/1000 dilution in PBS) or phage-  
4 displayed VHH (1/2500 dilution in PBS). One hundred μL of the mixture was added to wells and  
5 the plate was incubated for 2 h at room temperature with gentle shaking. The plate was washed  
6 (5 times for the VELISA and 10 for the PELISA) with PBST. One hundred μL of goat anti-HA  
7 tag PAb-HRP (1/10000 dilution in PBS) or goat anti-M13 phage MAb-HRP (1/5000 dilution in  
8 PBS) was added to wells, followed by 1 h incubation at room temperature. After 5 washings, 100  
9 μL of HRP substrate solution was added and the reaction was stopped after 15 min by adding 50  
10 μL of 2 M sulfuric acid. The plates were read with a plate reader (Molecular device, Sunnyvale,  
11 CA) at absorbance of 450 with background reading at 650 nm. The obtained absorbance was  
12 plotted against the concentrations of 3-PBA using the Sigma plot software version 11.0.

1  
2  
4  
6  
8  
9  
13  
14  
15  
17  
19

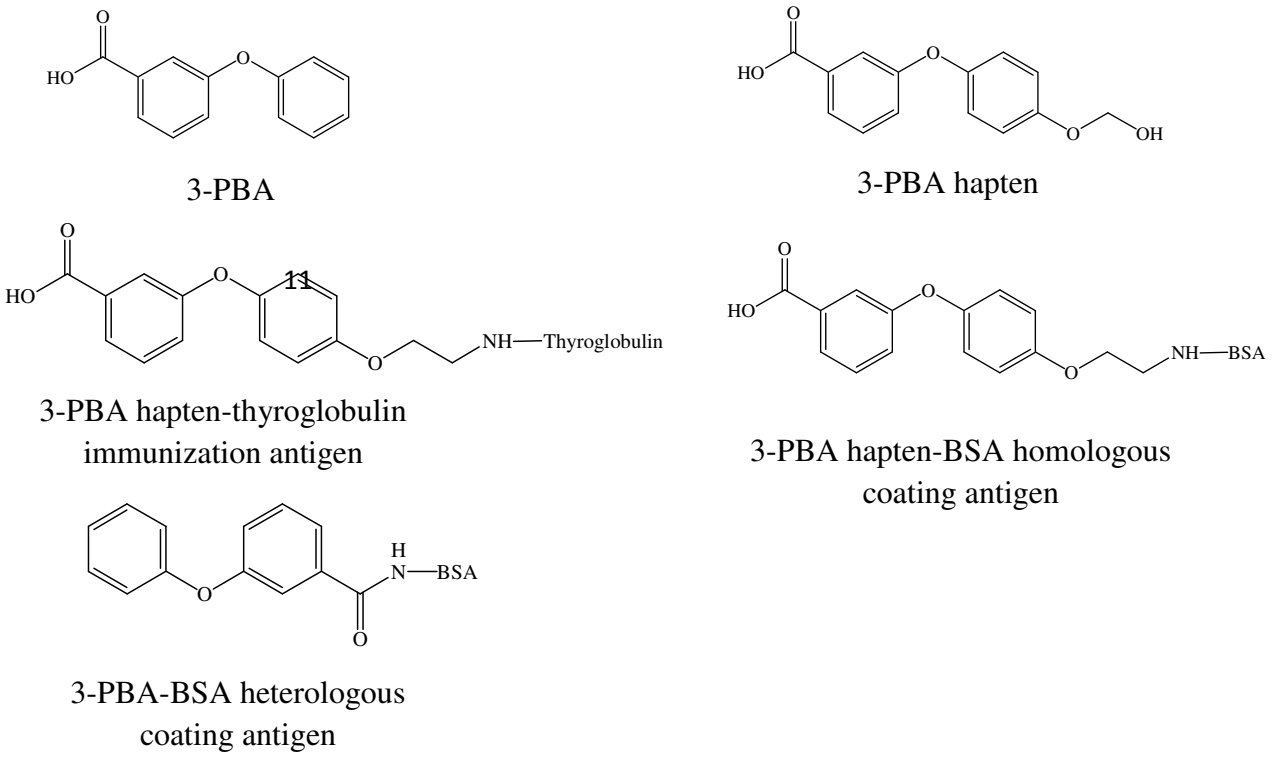

Figure S-1. Structure of 3-PBA, 3-PBA hapten, homologous, and heterologous coating antigens



1

2

3

|          | FR1                       | CDR1         | FR2                 | CDR2        | FR3                                    |
|----------|---------------------------|--------------|---------------------|-------------|----------------------------------------|
| 3P5ThC19 | QLQLVESGGGLAQPGGSLRLSCLAS | GFTLDSYG     | IGWFRQAPGKGRFFGC    | ISSFGGST    | NYADSVKGRFTISRDNAKNTVYLQMNSLKPEDTAVYYC |
| 3P5ThC15 | .....V.....T..A..EH..     | .....A..EH.. | .....E..A..F..TLD.. | .....R..... | .....R.....                            |
| 3P5ThC1  | .V.....V.....A..TS..Y..   | .....TS..Y.. | .....E..GVA..       | .....S..G.. | .....I..---.....F.....                 |
| 3P5ThC12 | .V.....V.....A..S..EY..   | .....S..EY.. | .....E..GVA..       | .....S..R.. | .....IRE---.....E.....L.....I.....     |
| 3P4ThC9  | .V.....V.....A..S..EY..   | .....S..EY.. | .....MA..GVA..      | .....R..... | .....LRE---.....E.....L.....I.....     |
| 3P4ThC6  | .....V.....A..S..EY..     | .....S..EY.. | .....E..GVA..       | .....G..R.. | .....LRE---.....E.....L.....I.....     |
| 3P4ThC11 | .V.....V.....A..S..E..    | .....S..E..  | .....E..GIV..       | .....Y..... | .....R..T.....E.....N.....             |

  

|          | CDR3                    | FR4                  |
|----------|-------------------------|----------------------|
| 3P5ThC19 | AAAPFYKCGTYNYSAFRS      | WGQGTQVTVSSEPKTPKPQD |
| 3P5ThC15 | .....N.....             | .....                |
| 3P5ThC1  | ...Q..R...R.....        | .....                |
| 3P5ThC12 | ...Q..I...R..T...T..... | .....                |
| 3P4ThC9  | ...Q..I...Q..T...T..... | .....                |
| 3P4ThC6  | ...K..T...Q..T...T..... | .....                |
| 3P4ThC11 | ...Q..I...R.....        | .....                |

4

5

6 Figure S-2. Amino acid sequence alignment of the isolated clones. The deduced amino acid  
7 sequences of the seven clones isolated from the phage VHH library are given in the single-letter  
8 code. Dots are used to denote residues identical to those of clone 3P5ThC19 that is arbitrarily  
9 taken as a reference sequence. Gaps were introduced to improve the alignment and are marked  
10 with dashes. Solid-line boxes outline the characteristic amino acid substitutions of VHH FR2.

11

12

13

14

15

16

17

18

1

2

Table S-1. Recovery of 3-PBA by GC-MS and VELISA

| Fortification level<br>(ng/mL) | GC-MS               |                         | VELISA              |                         |
|--------------------------------|---------------------|-------------------------|---------------------|-------------------------|
|                                | Measured<br>(ng/mL) | Average<br>recovery (%) | Measured<br>(ng/mL) | Average<br>recovery (%) |
| 1                              | <sup>1</sup> ND     |                         | 1.1±0.04            | 110                     |
| 5                              | 3.4±0.3             | 68                      | 4.9±0.2             | 98                      |
| 20                             | 18±0.7              | 87.5                    | 18±0.4              | 91                      |
| 50                             | 51±1.7              | 101.4                   | 41±1.0              | 82                      |

<sup>1</sup>Not detected

3

4

5

## 6 References

7 (1). Shan, G.; Huang, H.; Stoutamire, D. W.; Gee, S. J.; Leng, G.; Hammock, B. D. *Chem. Res.*

8 *Toxicol.* **2004**, 17, 218-225.

9 (2). Maass, D. R.; Sepulveda, J.; Pernthaner, A.; Shoemaker, C. B. *J. Immunol. Methods* **2007**,

10 324, 13-25.

11
